# Supplementary material for: Zn electrode with a layer of nanoparticles for selective electroreduction of CO2 to formate in aqueous solutions
Source: Royal Society of Chemistry journal article supplement (doi:10.1039/c6ta07000k), 2016-01-01
Supplement: c6ta07000k1.pdf [file c6ta07000k1.pdf]

## Supporting Information

### A Novel Nanostructured Zn Electrode for Selective Electroreduction of CO<sub>2</sub> to Formate in Aqueous Solutions

Taotao Zhang<sup>a,c</sup>, Hexiang Zhong<sup>a,b\*</sup>, Yanling Qiu<sup>a</sup>, Xianfeng Li<sup>a,b</sup>, Huamin Zhang<sup>a,b\*</sup>

- a. Division of Energy Storage, Dalian Institute of Chemical Physics, Chinese Academy of Sciences, 457 Zhongshan Road, Dalian 116023 (P.R. China), \*Email: zhonghexiang@dicp.ac.cn, zhanghm@dicp.ac.cn.  
b. Collaborative Innovation Center of Chemistry for Energy Materials (iChEM), Dalian 116023 (P.R. China).  
c. University of Chinese Academy of Sciences, Beijing 100039 (P.R. China).

A field emission scanning electron microscopy (FESEM) was used to observe the morphology of the D-Zn. As shown in Figure S1 d, the rock like texture consists of thin layer plates, which lie on each other. It has been proved that the current density during the deposition can significantly influence the growth direction of platelets.<sup>1</sup> In our paper, during the deposition process of Zn, the cathode polarization effect was reduced due to low deposition current density. This results in lower nucleation rate, larger grain size, and planes with low surface energy which tends to increase their surface area.<sup>2</sup> The basal {00.2} plane have the lowest surface free energy in zinc crystal due to its compactness. As a consequence, oriented polycrystalline growth of zinc trends to develop a {00.2} fiber texture component.<sup>3</sup>

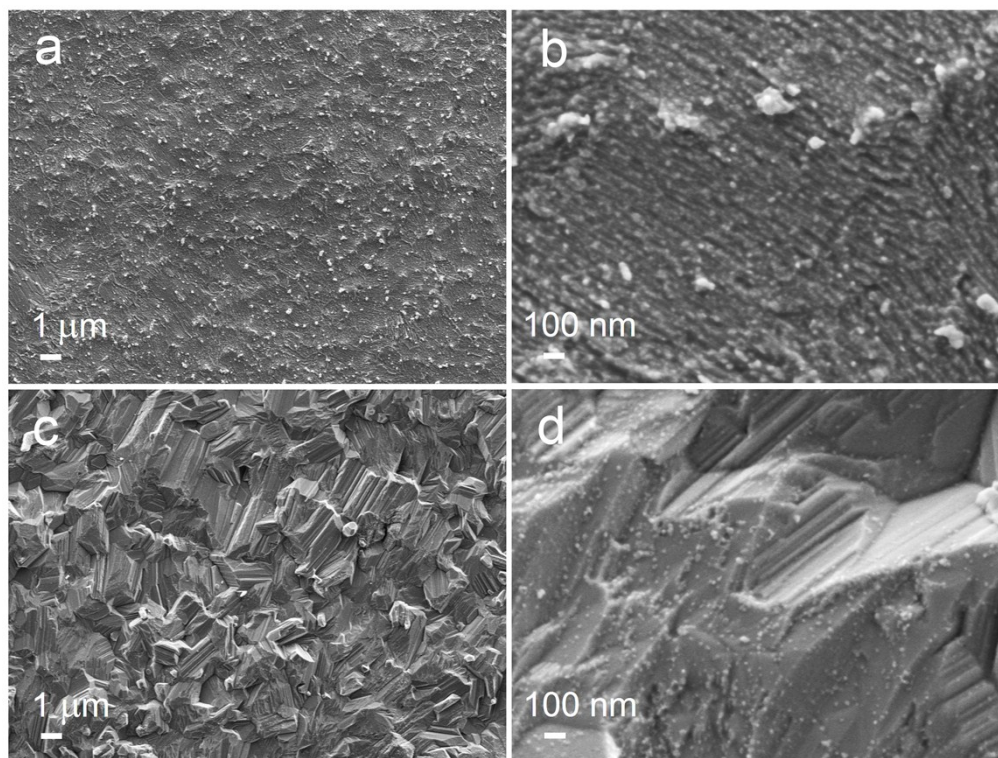

Figure S1. Low-resolution SEM and high-resolution SEM images of Zn-foil (a) (b) and D-Zn (c) (d).

The roughness measurement of the electrodes were conducted in N<sub>2</sub> purged 0.5 M NaHCO<sub>3</sub> aqueous solution at various scan rates. The scanning potential ranges from -0.5 to -0.3 V, because no active redox peak was observed in this regime. The double-layer width of the CV is thereby directly related to the capacitance and proportional to roughness of the electrodes. Figure S2 shows the CVs for the Zn foil and RAD-Zn, the linear regression of the double layer and the roughness factor of each material obtained from the electrochemical studies. This analysis shows that the RAD-Zn presents the highest roughness, about 4 times rougher than Zn foil (Table S1).

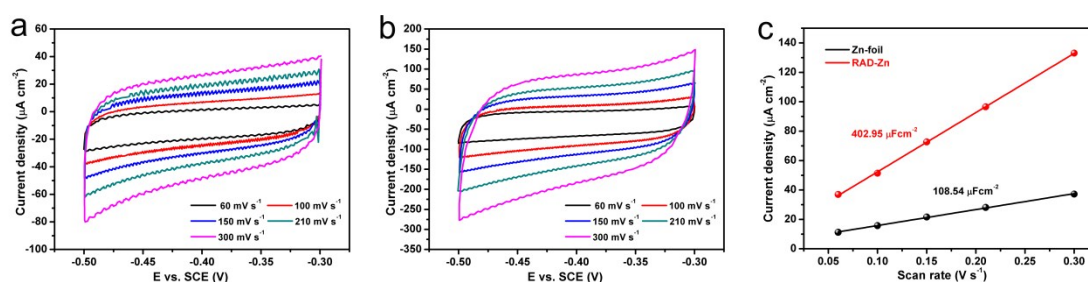

Figure S2. Capacitive behaviors on the prepared Zn electrodes: The CVs of (a) Zn-foil and (b) RAD-Zn with a potential range from -0.5 to -0.3 V (vs SCE) in a N<sub>2</sub>-bubbled 0.5 M NaHCO<sub>3</sub> electrolyte. (c) Current density plots at various CV scan rates. The linear regression of the double layer capacitances and the roughness factor of each material were noted in the figure.

Table S1. The capacitances and surface roughness factors of the electrodes.

| Sample  | Capacitance (μF cm <sup>-2</sup> ) | Surface roughness factor |
|---------|------------------------------------|--------------------------|
| Zn-foil | 108.54                             | 1                        |
| RAD-Zn  | 402.95                             | 3.7                      |

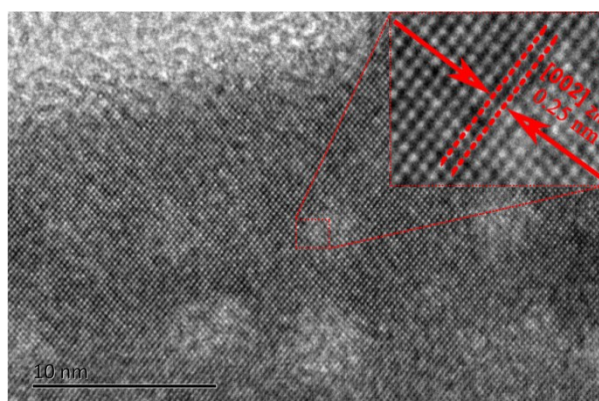

Figure S3. A typical HRTEM image of the internal slice under the surface of AD-Zn.

Table S2. XPS results for different samples.

|         | Peak Area / RSF |        | atomic ratio | Components of O 1s |              |                    |              |                    |              | atomic ratio |
|---------|-----------------|--------|--------------|--------------------|--------------|--------------------|--------------|--------------------|--------------|--------------|
|         |                 |        |              | a                  |              | b                  |              | c                  |              |              |
| Sample  | Zn 2p           | O 1s   | Zn/O         | Binding Energy(ev) | Peak Area(P) | Binding Energy(ev) | Peak Area(P) | Binding Energy(ev) | Peak Area(P) | a/b/c        |
| Zn-foil | 3835.8          | 6815.7 | 0.56         | 532.4              | 2976.44      | 531.7              | 13992.7      | 530.4              | 3037.43      | 1.0/4.7/1.0  |
| D-Zn    | 4013.5          | 6129.2 | 0.65         | 532.2              | 6679.19      | 531.5              | 5064.35      | 530.3              | 6601.65      | 1.0/0.8/1.0  |
| AD-Zn   | 5725.8          | 6527.0 | 0.88         | 532.3              | 3273.48      | 531.5              | 4928.54      | 530.3              | 11665.2      | 1.0/1.5/3.6  |
| RAD-Zn  | 3754.8          | 7989.3 | 0.47         | 532.5              | 7579.83      | 531.7              | 10114.9      | 530.6              | 6285.56      | 1.0/1.3/0.8  |

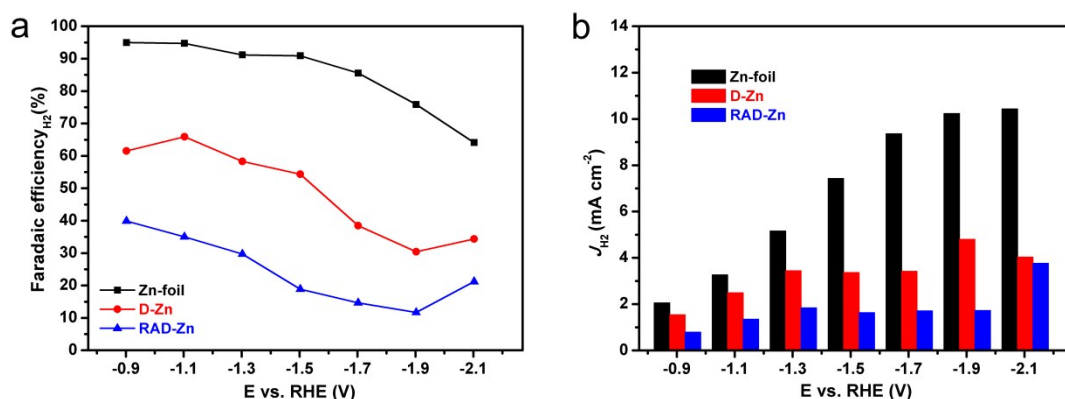

Figure S4. Comparison of (a) hydrogen faradaic efficiency, (b) hydrogen current density for Zn-foil, D-Zn and RAD-Zn at  $-0.93$  V to  $-2.13$  V (vs RHE) in  $CO_2$  saturated  $0.5$  M  $NaHCO_3$  solution.

## References

1. K. Raeissi, A. Saatchi, M. A. Golozar and J. A. Szpunar, *Surface and Coatings Technology*, 2005, 197, 229-237.
2. D. Y. Li and J. A. Szpunar, *Electrochimica acta*, 1997, 42, 47-60.
3. Matysina Z A, Chuprina L M, Zaginaichenko S Y, *Journal of Physics and Chemistry of Solids*, 1992, 53(1): 167-174.
